# Supplementary material for: Analysis of Mycotoxins and Cytotoxicity of Airborne Molds Isolated from the Zoological Garden—Screening Research
Source: MDPI journal article supplement (doi:10.3390/pathogens13040294), 2024-03-30
Supplement: s1 [file s1]

**Supplemental Table S1.** BLAST analysis of the ITS rDNA of fungi found in a zoological garden. All E values were set to zero.

| Fungal Species                      | Isolate | GenBank Accession No | Identity with Sequence from GenBank |              |
|-------------------------------------|---------|----------------------|-------------------------------------|--------------|
|                                     |         |                      | Identity                            | Accession No |
| <i>Aspergillus niger</i>            | 7fj     | <u>OR807891</u>      | 100%                                | MT620753.1   |
| <i>Aspergillus niger</i>            | 15cj    | <u>OR807968.1</u>    | 100%                                | MT620753.1   |
| <i>Aspergillus niger</i>            | 25aj    | PP494172             | 100%                                | MT620753.1   |
| <i>Aspergillus ochraceus</i>        | 3bz     | OR801670.1           | 100%                                | OL691169.1   |
| <i>Aspergillus westerdijkiae</i>    | 1dz     | OR816133.1           | 99.55%                              | MT635281.1   |
| <i>Aspergillus ostianus</i>         | 17cj    | OR801711.1           | 100%                                | ON207625.1   |
| <i>Aspergillus elegans</i>          | 14al    | PP494195             | 100%                                | MN886600.1   |
| <i>Aspergillus elegans</i>          | 24bz    | PP494173             | 100%                                | OR594271.1   |
| <i>Aspergillus elegans</i>          | 22cz    | OR802142             | 100%                                | MN886600.1   |
| <i>Aspergillus flavus</i>           | 2gw     | OR806964.1           | 100%                                | OR397999.1   |
| <i>Aspergillus flavus</i>           | 18aw    | OR806964.1           | 100%                                | MT528892.1   |
| <i>Aspergillus giganteus</i>        | 19cz    | OR808008             | 100%                                | MT529982.1   |
| <i>Aspergillus sydowii</i>          | 4bl     | OR807981.1           | 100%                                | OR807981.1   |
| <i>Aspergillus niger</i>            | 25cz    | PP494174             | 99.82%                              | MT628904.1   |
| <i>Aspergillus fumigatus</i>        | 3fw     | OR8069661            | 100%                                | MN559667.1   |
| <i>Penicillium commune</i>          | 22az    | PP494181             | 100%                                | KY606533.1   |
| <i>Penicillium commune</i>          | 17fz    | PP494180             | 100%                                | MT378399.1   |
| <i>Penicillium solitum</i>          | 15aj    | OR810004.1           | 99.63%                              | OM959583.1   |
| <i>Penicillium raistrickii</i>      | 9bw     | OR810006.1           | 100%                                | MK450710.1   |
| <i>Penicillium glandicola</i>       | 6aw     | OR810010.1           | 100%                                | MH860946.1   |
| <i>Penicillium griseofulvum</i>     | 17az    | OR810001.1           | 100%                                | MT378399.1   |
| <i>Penicillium griseofulvum</i>     | 18cz    | PP494182             | 100%                                | MT378399.1   |
| <i>Penicillium griseofulvum</i>     | 19dz    | OR810000.1           | 100%                                | MT378399.1   |
| <i>Penicillium chrysogenum</i>      | 20 Aez  | PP494176             | 100%                                | MT229079.1   |
| <i>Penicillium chrysogenum</i>      | 15aw    | OR810002.1           | 100%                                | JQ082504.1   |
| <i>Penicillium glabrum</i>          | 1bw     | PP494188             | 100%                                | MN856208.1   |
| <i>Penicillium citreosulfuratum</i> | 1az     | OR810011.1           | 100%                                | MN592912.1   |
| <i>Penicillium citrinum</i>         | 15az    | OR810014.1           | 100%                                | MT597829.1   |
| <i>Penicillium citrinum</i>         | 19bz    | PP494183             | 100%                                | JN859855.1   |
| <i>Penicillium citrinum</i>         | 15dl    | PP494191             | 100%                                | JN859855.1   |
| <i>Penicillium citrinum</i>         | 15bl    | OR810013.1           | 99%                                 | MK451671.1   |
| <i>Penicillium steckii</i>          | 18cw    | OR810015.1           | 100%                                | MK805469.1   |
| <i>Penicillium steckii</i>          | 20cz    | OR810016.1           | 100%                                | MT582790.1   |
| <i>Penicillium steckii</i>          | 18bz    | PP494177             | 100%                                | MK805469.1   |
| <i>Penicillium sumatraense</i>      | 15bz    | PP494184             | 100%                                | MT582791.1   |
| <i>Penicillium sumatraense</i>      | 16dw    | PP494190             | 99.15%                              | MK910053.1   |
| <i>Penicillium brevicompactum</i>   | 2bj     | PP494189             | 100%                                | MT558924.1   |
| <i>Penicillium bialowieziense</i>   | 9bj     | OR810007.1           | 100%                                | MT582764.    |
| <i>Penicillium olsonii</i>          | 13bz    | PP494186             | 100%                                | MT133794.1   |
| <i>Penicillium copticola</i>        | 17bz    | PP494185             | 100%                                | MH864539.1   |
